# Supplementary material for: Structure and properties of bivalent nickel and copper complexes with pyrazine-amide-thioether coordination: stabilization of trivalent nickel
Source: Royal Society of Chemistry journal article supplement (doi:10.1039/b504893a), 2005-01-01

---

## Structure and properties of bivalent nickel and copper complexes with pyrazine-amide-thioether coordination: Stabilization of trivalent nickel

---

Akhilesh Kumar Singh and Rabindranath Mukherjee\*

*Department of Chemistry, Indian Institute of Technology Kanpur, Kanpur 208 016, India*

*E-mail: [rnm@iitk.ac.in](mailto:rnm@iitk.ac.in); Fax: +91-512-2597437.*

### Electronic Supporting Information (ESI)

**Fig. S1.** UV/VIS spectrum (in CH<sub>2</sub>Cl<sub>2</sub>) of [Cu<sup>II</sup>(bpzctb)] (2).

**Fig. S2.** Reciprocal molar susceptibility vs temperature plots for

(a) [Ni<sup>II</sup>(bpzctb)] (1) and (b) [Cu<sup>II</sup>(bpzctb)] (2).

**Fig. S3.** EPR spectrum of a polycrystalline sample of [Cu<sup>II</sup>(bpzctb)] (2) at 300 K.

**Fig. S4.** EPR spectrum of [Ni<sup>III</sup>(bpzctb)]<sup>+</sup> (coulometrically generated in CH<sub>2</sub>Cl<sub>2</sub>) at 120 K.

**Fig. S5.** UV/VIS spectrum of [Ni<sup>III</sup>(bpctb)]<sup>+</sup> (coulometrically generated in CH<sub>2</sub>Cl<sub>2</sub>).

**Fig. S6.** EPR spectrum of [Ni<sup>III</sup>(bpctb)]<sup>+</sup> (coulometrically generated in CH<sub>2</sub>Cl<sub>2</sub>) at 300 K.

**Fig. S7.** EPR spectrum of [Ni<sup>III</sup>(bpctb)]<sup>+</sup> (coulometrically generated in CH<sub>2</sub>Cl<sub>2</sub>) at 120 K.

**Fig. S1.** UV/VIS spectrum (in CH<sub>2</sub>Cl<sub>2</sub>) of [Cu<sup>II</sup>(bpzctb)] (2).

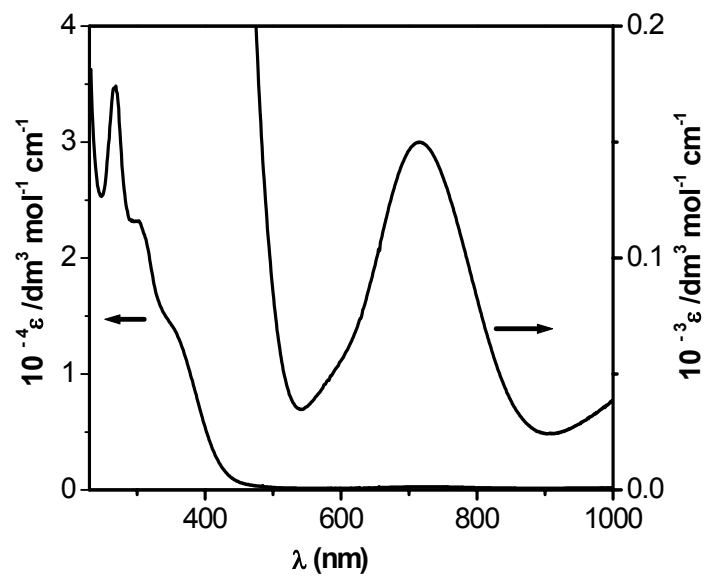

**Fig. S2.** Reciprocal molar susceptibility vs. temperature plots for (a) [Ni<sup>II</sup>(bpzctb)] (1) and (b) [Cu<sup>II</sup>(bpzctb)] (2).

(a)

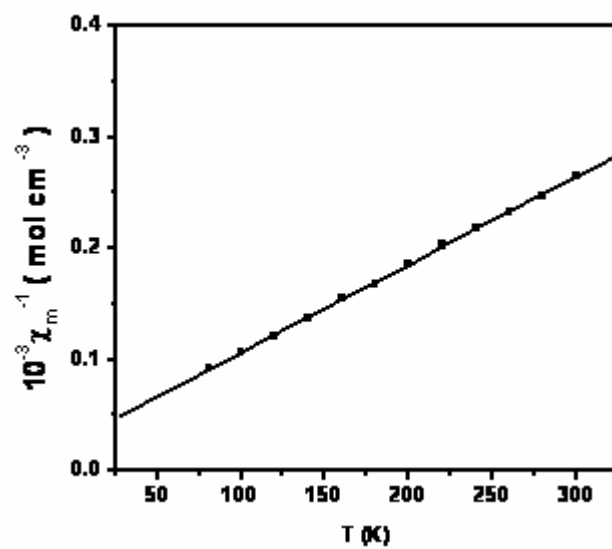

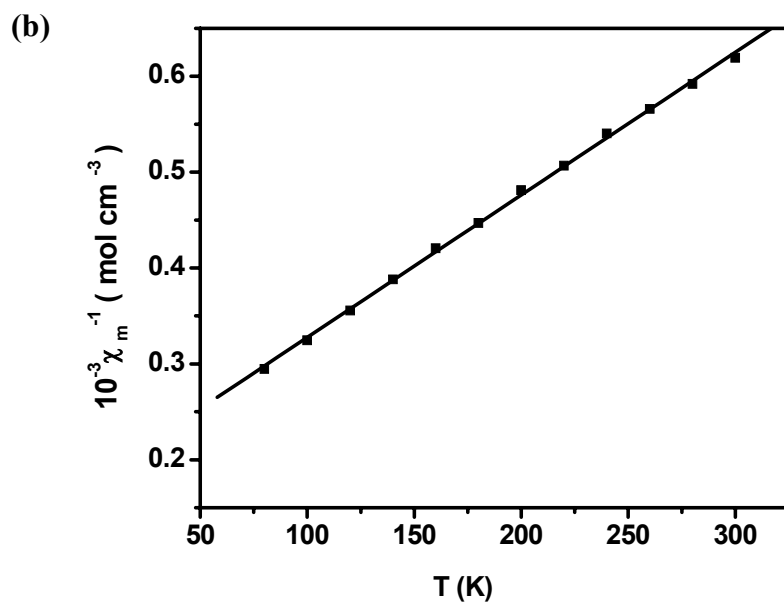

**Fig. S3.** EPR spectrum of a polycrystalline sample of  $[\text{Cu}^{\text{II}}(\text{bpzctb})]$  (2) at 300 K.

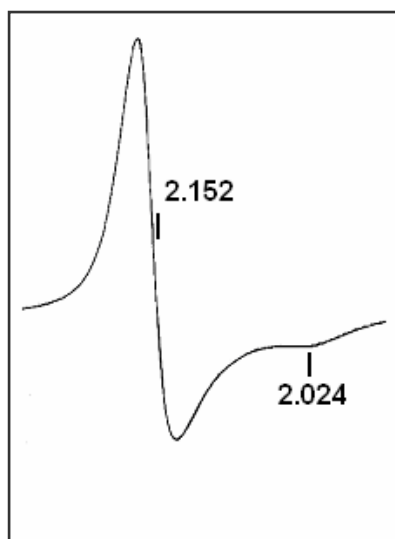

**Fig. S4.** EPR spectrum of  $[\text{Ni}^{\text{III}}(\text{bpzctb})]^+$  (coulometrically generated in  $\text{CH}_2\text{Cl}_2$ ) at 120 K.

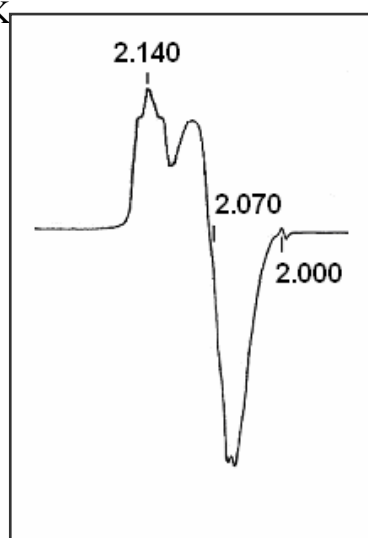

**Fig. S5.** UV-vis spectrum of  $[\text{Ni}^{\text{III}}(\text{bpctb})]^+$  (coulometrically generated in  $\text{CH}_2\text{Cl}_2$ ).

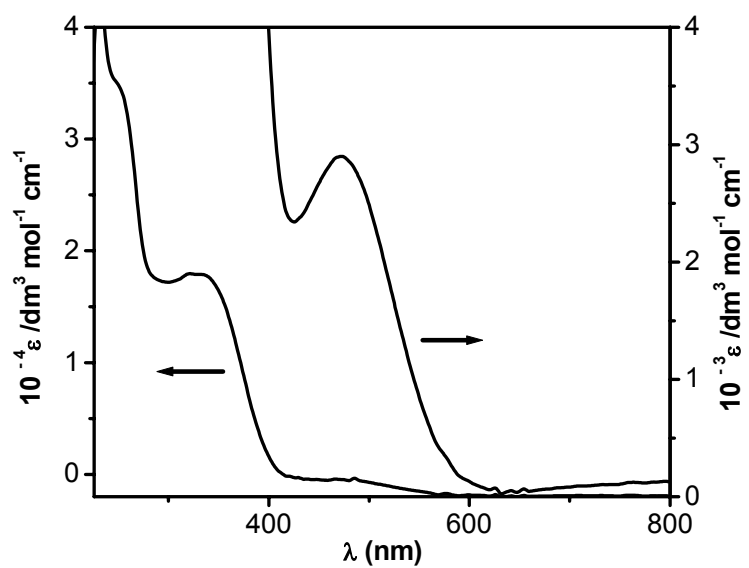

**Fig. S6.** EPR spectrum of  $[\text{Ni}^{\text{III}}(\text{bpctb})]^+$  (coulometrically generated in  $\text{CH}_2\text{Cl}_2$ ) at 300 K.

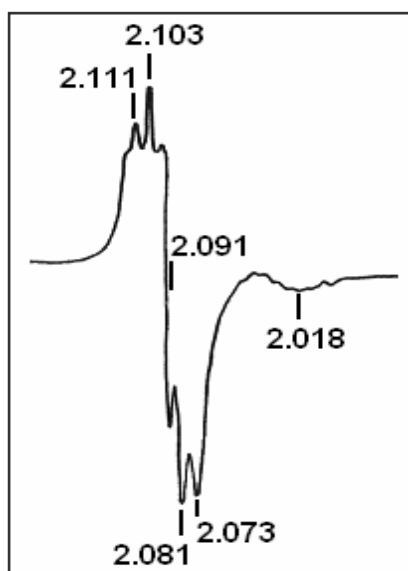

**Fig. S7.** EPR spectrum of  $[\text{Ni}^{\text{III}}(\text{bpctb})]^+$  (coulometrically generated in  $\text{CH}_2\text{Cl}_2$ ) at 120 K.

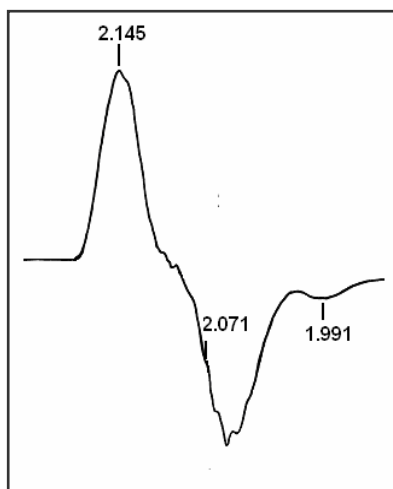

Supplement: b504893a.pdf [file b504893a.pdf]
